# Supplementary material for: Notch Signaling Activation Enhances Human Adipose-Derived Stem Cell Retinal Differentiation
Source: Hindawi journal article supplement (doi:10.1155/2018/9201374), 2018-10-16

Lipid Deposition

Alkaline Phosphatase

Calcium Deposition

Positive control

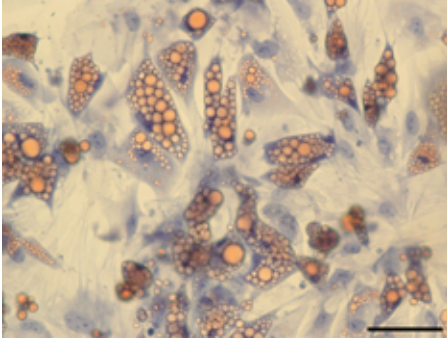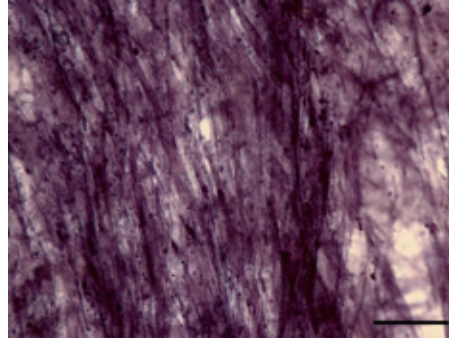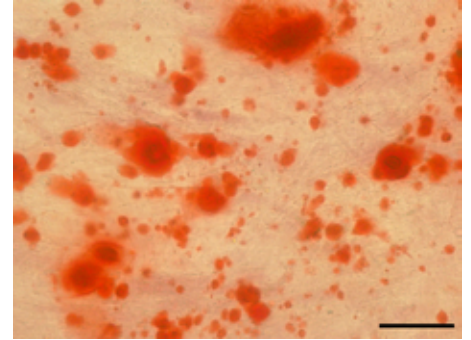

Without induction

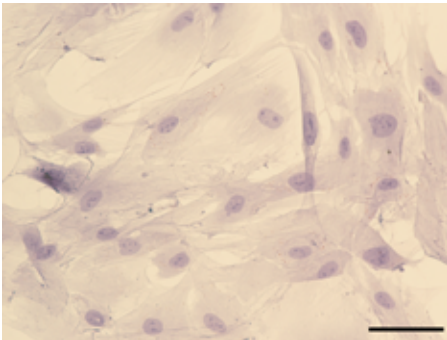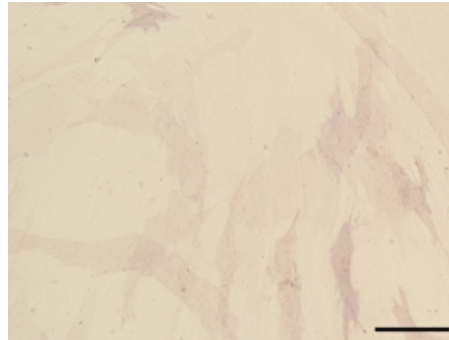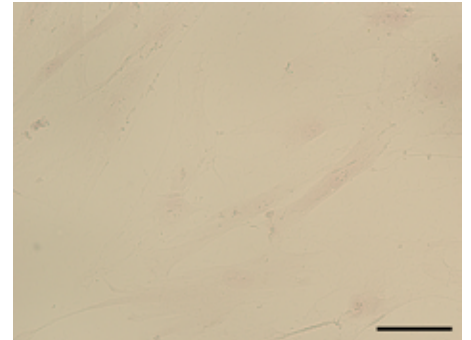

Retinal induction

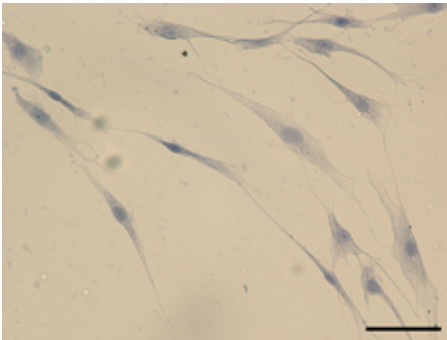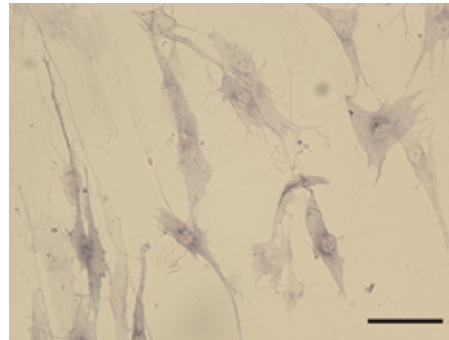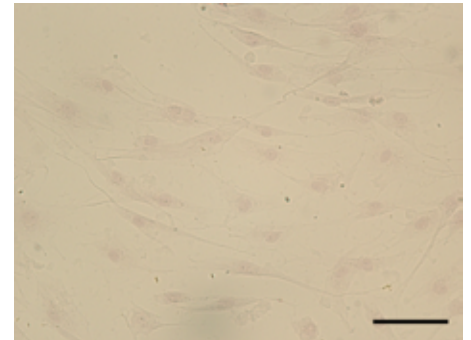

Supplement: f3 [file 9201374.f3.pdf]
